# Supplementary material for: Determinants of delay in timely treatment seeking for diarrheal diseases among mothers with under-five children in central Ethiopia: A case control study
Source: PLOS journal article supplement (doi:10.1371/journal.pone.0193035), 2018-03-27
Supplement: S1 (10.1371/journal.pone.0193035.s001) [file journal.pone.0193035.s001]

## **English version questionnaire used to collect data in Central Ethiopia**

### **Section 1: General information about child and parental socio-demographic characteristics.**

|     |                                                               |                                                                                                                                                |             |
|-----|---------------------------------------------------------------|------------------------------------------------------------------------------------------------------------------------------------------------|-------------|
| 101 | Age of child                                                  | ----- in Months                                                                                                                                | <b>Skip</b> |
| 102 | Age of mother/ caregiver during the interview                 | ----- in Years                                                                                                                                 |             |
| 103 | Sex of child                                                  | 1. Male<br>2. Female                                                                                                                           |             |
| 104 | Birth order of child                                          | 1. First    2. Second<br>3. Third    4. Fourth<br>5. Fifth and above                                                                           |             |
| 105 | Place of residence                                            | 1. Rural    2. Urban                                                                                                                           |             |
| 106 | Marital status of mother/caregiver                            | 1. Single    2. Married<br>3. Divorced    4. Widowed                                                                                           |             |
| 107 | Religion of mothers/caregiver                                 | 1. Orthodox    2. Protestant<br>3. Muslim    4. Catholic<br>5. Other (specify).....                                                            |             |
| 108 | Ethnicity                                                     | 1. Oromo    2. Amhara<br>3. Gurage<br>4. Other (specify).....                                                                                  |             |
| 109 | Education status of mother/care giver                         | 1. Unable to read and write.<br>2. Read and write<br>3. Primary school<br>4. Secondary school<br>5. Certificate course<br>6. Diploma and above |             |
| 110 | Is mother/caregiver graduated from health extension packages? | 1. Yes<br>2. No                                                                                                                                |             |
| 111 | Is mother/caregiver involved in community conversation?       | 1. Yes<br>2. No                                                                                                                                |             |
| 112 | Education of father                                           | 1. Unable to read and write.<br>2. Read and write<br>3. Primary school<br>4. Secondary school<br>5. Certificate course<br>6. Diploma and above |             |
| 113 | Occupation of mothers/caregivers                              | 1. House wife's<br>2. Governmental work<br>3. Merchant<br>4. Farmer<br>5. Labor worker<br>6. Student<br>7. Other (specify).....                |             |
| 114 | Occupation of Father                                          | 1. Governmental work<br>2. Merchant<br>3. Farmer<br>4. Labor worker<br>5. Student<br>6. Other (specify).....                                   |             |
| 115 | Number of family members                                      | ----- in Numbers                                                                                                                               |             |

### **Section 2: Enabling factors**

|     |                |                 |  |
|-----|----------------|-----------------|--|
| 201 | Monthly income | ----- ETB/month |  |
|-----|----------------|-----------------|--|

|     |                                                                 |                                                                                                                                                                                                                                                                                    |  |
|-----|-----------------------------------------------------------------|------------------------------------------------------------------------------------------------------------------------------------------------------------------------------------------------------------------------------------------------------------------------------------|--|
| 202 | Cost of treatment in health facility for child hood diarrhea?   | 1. Easy to pay<br>2. Difficult to pay<br>3. Very difficult to pay                                                                                                                                                                                                                  |  |
| 203 | Does your house have the following material?                    | 1. Radio      1. Yes      2. No<br>2. Television   1. Yes      2. No<br>3. Telephone   1. Yes      2. No<br>4. Electricity   1. Yes      2. No<br>5. Car or track   1. Yes      2. No                                                                                              |  |
| 204 | Which health facility is close to your house?                   | 1. Government<br>2. Private                                                                                                                                                                                                                                                        |  |
| 205 | Which health facility do you prefer for children with diarrhea? | 1. Government<br>2. Private                                                                                                                                                                                                                                                        |  |
| 206 | Why did you prefer the selected health facility                 | 1. They do not charge to much<br>2. Because, they are near<br>3. Because, they are respectful<br>4. Thorough examination<br>5. Low waiting time<br>6. Necessary medication is available<br>7. Treatment is effective<br>8. Always open or early opening<br>9. Other (Specify)..... |  |
| 207 | How close is the selected facility on foot?                     | 1. < 15 minutes<br>2. 15-30 minutes<br>3. 30-60 minutes<br>4. One-Two hour<br>5. Above two hour                                                                                                                                                                                    |  |

### Section 3: Disease related factors

|     |                                                                |                                                                                                                                                                                                                                          |  |
|-----|----------------------------------------------------------------|------------------------------------------------------------------------------------------------------------------------------------------------------------------------------------------------------------------------------------------|--|
| 301 | What was your first response when your Child had got diarrhea? | 1. Take to health facilities<br>2. Take to traditional treatment<br>3. Self-treatment at home<br>4. Treat the child with drug buying from pharmacies or drug sellers without prescriptions<br>5. Treat with holy water<br>6. Did nothing |  |
| 302 | When did you seek medical care for diarrhea of children?       | 1. Blood in diarrhea<br>2. Child vomits every thing<br>3. Child unable to feed or feed poorly<br>4. Has fever<br>5. Eye ball sunken<br>6. For any diarrhea<br>7. Other (specify).....                                                    |  |

|     |                                                                 |                                                                                                                                                                                                                                                                                                                                                                       |                            |
|-----|-----------------------------------------------------------------|-----------------------------------------------------------------------------------------------------------------------------------------------------------------------------------------------------------------------------------------------------------------------------------------------------------------------------------------------------------------------|----------------------------|
| 303 | What makes you seek medical care today?                         | 1. Blood in diarrhea<br>2. Child vomits every thing<br>3. Child unable to feed or feed poorly<br>4. Has fever<br>5. Eye ball sunken<br>6. Increased thirsty<br>7. Irritability or restlessness<br>8. Increased frequency of diarrhea<br>8. Only diarrhea<br>9. Someone (Husband, HEW, neighbor) told to take the child to health facility<br>10. Other (specify)..... |                            |
| 304 | Frequency of stool per day                                      | ----- In days.                                                                                                                                                                                                                                                                                                                                                        |                            |
| 305 | Type of diarrhea                                                | 1. Bloody<br>2. Mucoid<br>3. Watery<br>4. Other (specify).....                                                                                                                                                                                                                                                                                                        |                            |
| 306 | Who was decided to take the child for medical treatment?        | 1. My self<br>2. Fathers<br>3. Grand parents<br>4. Other (specify).....                                                                                                                                                                                                                                                                                               |                            |
| 307 | Did the child encounter diarrhea before in the last six month?  | 1. Yes    2. No                                                                                                                                                                                                                                                                                                                                                       |                            |
| 308 | If yes to Q307, did you visit health facility?                  | 1. Yes    2. No                                                                                                                                                                                                                                                                                                                                                       | <b>If No, skip to Q311</b> |
| 309 | If yes to Q308, did that visit help you for your today's visit? | 1. Yes<br>2. No                                                                                                                                                                                                                                                                                                                                                       |                            |
| 310 | If Yes to Q309, how?                                            | 1. Counseled about the importance of visiting health facility for diarrhea<br>2. Told the danger of not visiting health facility for diarrhea<br>3. Satisfied with the treatment given<br>4. Satisfied with the respect given<br>5. Satisfied with examination of child<br>6. Other (specify).....                                                                    |                            |
| 311 | If No to Q308, how was the child cured?                         | 1. Take to traditional treatment<br>2. Self-treatment at home<br>3. Treat the child with drug buying from pharmacies or drug sellers without prescriptions<br>4. Treat with holy water<br>5. Resolved by it self<br>6. Other (specify).....                                                                                                                           |                            |
| 312 | Is there child died of diarrhea in                              | 1. Yes                                                                                                                                                                                                                                                                                                                                                                |                            |

|  |                                |       |  |
|--|--------------------------------|-------|--|
|  | the family or neighbor before? | 2. No |  |
|--|--------------------------------|-------|--|

#### Section 4: Promptness of treatment seeking for diarrhea in children

|     |                                                                                                               |                                                                                                                                                                                                                                                                                                                                                                                                                                                                                                                                                 |                                       |
|-----|---------------------------------------------------------------------------------------------------------------|-------------------------------------------------------------------------------------------------------------------------------------------------------------------------------------------------------------------------------------------------------------------------------------------------------------------------------------------------------------------------------------------------------------------------------------------------------------------------------------------------------------------------------------------------|---------------------------------------|
| 401 | How long your child had illness before seeking medical care?                                                  | 1. within < 24 hours after the onset of diarrhea<br>2. After 24-48 hours of onset of diarrhea<br>3. After 48-72 hrs of onset of diarrhea<br>4. After 3 to 7 days onset of diarrhea<br>5. After seven days of onset of diarrhea                                                                                                                                                                                                                                                                                                                  | <b>Skip if within one day to Q405</b> |
| 402 | If after one day of onset of diarrhea, What were the main reasons you were not seek medical care immediately? | 1. The disease resolve by itself over time<br>2. The disease resolved by itself before on the child or other child<br>3. Transportation difficulties.<br>4. Cost of medical care<br>5. No trust on health providers' competency.<br>6. Fear that S/he don't get immediate care or several waiting time in facility<br>7. Giving traditional medication at home<br>8. Buy medication from drug vendors<br>9. No treatment for the sickness<br>10. Lack of time<br>11. Shortage/lack of money<br>12. Illness was mild<br>13. Other (specify)..... |                                       |
| 403 | If you select traditional healer, what is the most important reason for sorting traditional healers           | 1. Don't get cure from medical care<br>2. They do not charge to much<br>3. They are respectful<br>4. There is no long waiting time<br>5. Treatment is effective<br>6. Maintain confidentiality<br>7. Maintain privacy<br>8. Because, family recommended it<br>9. Because, they are near<br>10. Other (specify).....                                                                                                                                                                                                                             |                                       |
| 404 | If you select private drug vendors, what is the most important reason for sorting drug vendors                | 1. They do not charge to much<br>2. They are respectful<br>3. There is no long waiting time<br>4. Treatment is effective<br>5. Maintain confidentiality<br>6. Maintain privacy<br>7. Because, family recommended it<br>8. Because, they are near<br>9. Other (specify).....                                                                                                                                                                                                                                                                     |                                       |
| 405 | If within one day of the onset of                                                                             | 1. Previous experience of the delay result in severity                                                                                                                                                                                                                                                                                                                                                                                                                                                                                          |                                       |

|     |                                                                                                                                    |                                                                                                                                                                                 |  |
|-----|------------------------------------------------------------------------------------------------------------------------------------|---------------------------------------------------------------------------------------------------------------------------------------------------------------------------------|--|
|     | diarrhea, what makes you urge to seek medical care early?                                                                          | 2.Symptoms worsen<br>3. Get the information about importance of early seeking for diarrhea.<br>4. Other (specify).....                                                          |  |
| 406 | If you get information about the importance of early treatment seeking for childhood diarrhea, what is your source of information? | 1. Health workers<br>2.HEWs through training or health education<br>3. During community conversation<br>4. Neighbors<br>5. Media (Television, radio)<br>5. Other (specify)..... |  |
